# Supplementary material for: Identification of furfural resistant strains of Saccharomyces cerevisiae and Saccharomyces paradoxus from a collection of environmental and industrial isolates
Source: PubMed Central journal article supplement (PMC4389715; doi:10.1186/s13068-015-0217-z), 2015-02-26
Supplement: 13068_2015_217_MOESM1_ESM.pdf [file 13068_2015_217_MOESM1_ESM.pdf]

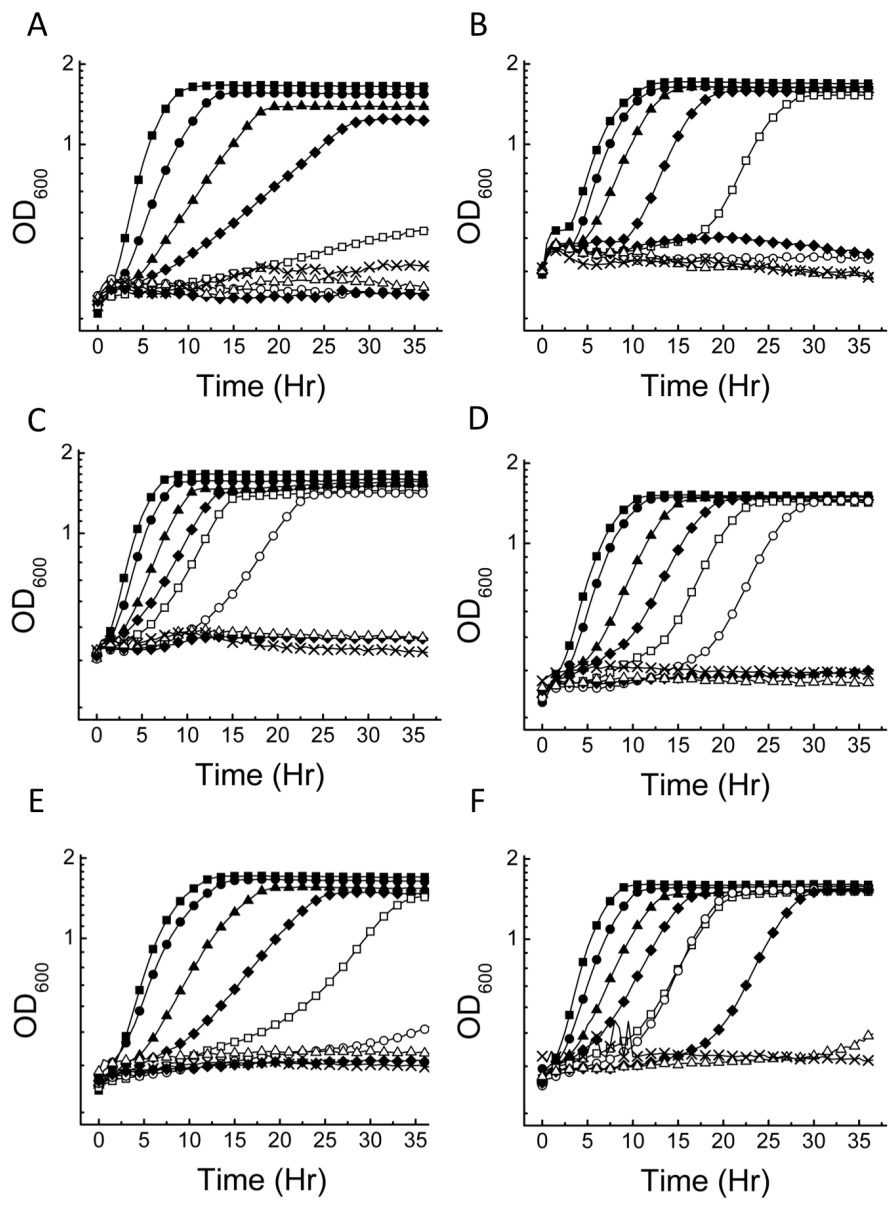

**Figure 3** Growth curves of *Sacchromyces* strains grown in yeast nutrient broth containing 100 mM glucose and furfural. Data shown are the average of three replicate experiments and are plotted on a logarithmic scale. (A) *S. cerevisiae* NCYC 2826, (B) *S. paradoxus* NCYC 3277, (C) *S. cerevisiae* NCYC 3312, (D) *S. cerevisiae* NCYC 3290, (E) *S. cerevisiae* NCYC 3284 and (F) *S. cerevisiae* NCYC 3451. Media was supplemented with furfural at concentrations of 0.1 mg ml<sup>-1</sup> (squares), 0.5 mg ml<sup>-1</sup>(circles), 1.0 mg ml<sup>-1</sup> (triangles), 1.5 mg ml<sup>-1</sup> (diamonds), 2.0 mg ml<sup>-1</sup> (open squares), 2.5 mg ml<sup>-1</sup> (open circles), 3.0 mg ml<sup>-1</sup> (diamonds), 3.5 mg ml<sup>-1</sup> (open triangles) and 4.0 mg ml<sup>-1</sup> furfural (crosses)
